# Supplementary material for: PIK3CAH1047R-induced paradoxical ERK activation results in resistance to BRAFV600E specific inhibitors in BRAFV600E PIK3CAH1047R double mutant thyroid tumors
Source: PubMed Central journal article supplement (PMC5732722; doi:10.18632/oncotarget.21732), 2017-10-11
Supplement: oncotarget-08-103207-s001.pdf [file oncotarget-08-103207-s001.pdf]

# PIK3CA<sup>H1047R</sup>-induced paradoxical ERK activation results in resistance to BRAF<sup>V600E</sup> specific inhibitors in BRAF<sup>V600E</sup> PIK3CA<sup>H1047R</sup> double mutant thyroid tumors

## SUPPLEMENTARY MATERIALS

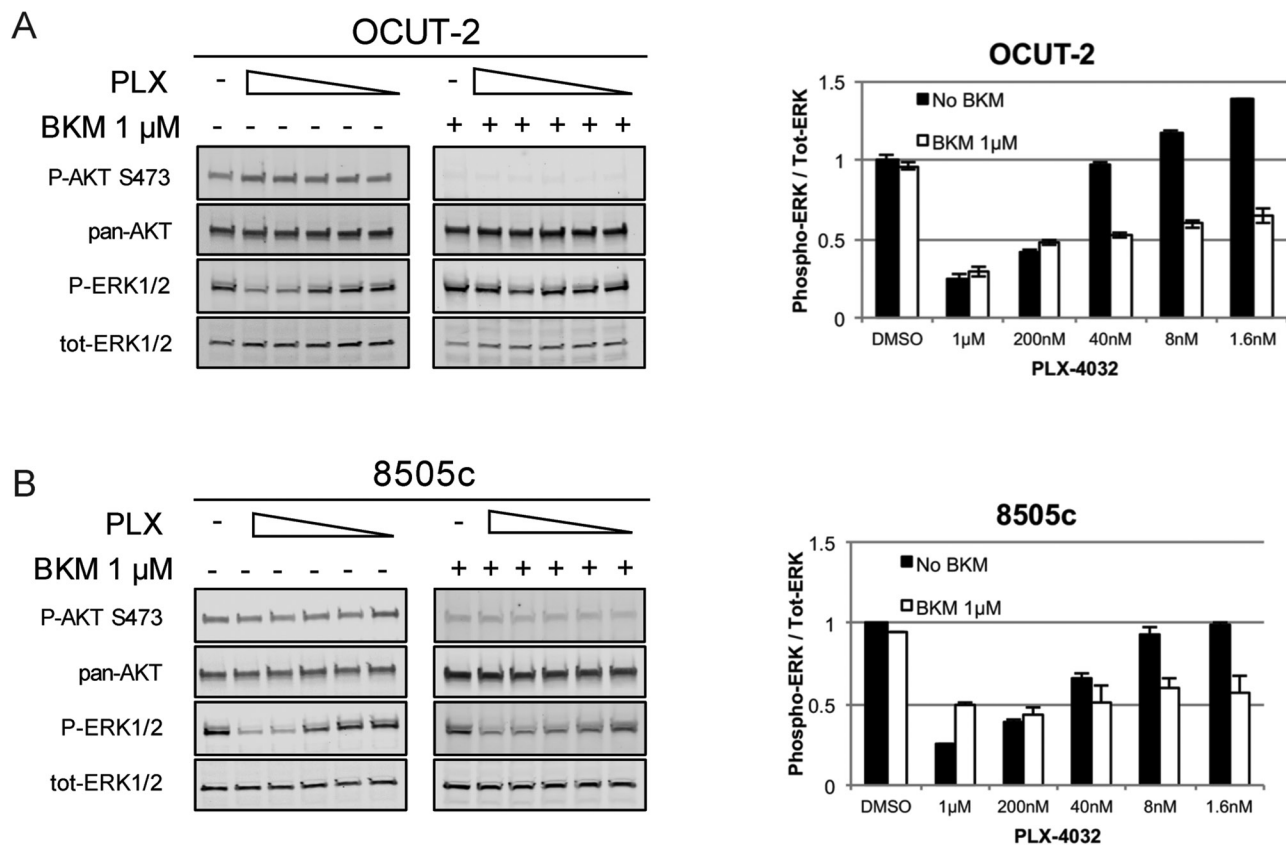

**Supplementary Figure 1: Paradoxical activation of ERK abrogated by BKM-120.** Representative western blot from total protein extracted from OCUT-2 (A) and 8505c (B) cells exposed to decreasing concentrations of PLX-4032 (from 1  $\mu$ M to 1.6 nM) in presence or absence of BKM-120 at 1  $\mu$ M. All experiments were performed in triplicates. The quantifications are expressed as average ratios of the three independent experiments.
